# Supplementary material for: ENERGY DEPENDENCE AND DIRECTIONAL DEPENDENCE OF THE DT-60 SILVER PHOSPHATE GLASS DOSIMETER
Source: Royal Society of Chemistry journal article supplement (doi:10.1039/d1ay00952d), 1952-07-29
Supplement: d1ay00952d1.pdf [file d1ay00952d1.pdf]

## Supporting Information

# Sensitive Osteosarcoma Diagnosis Through Five-Base Telomerase Product-Triggered CRISPR-Cas12a Enhanced Rolling Circle Amplification

Xing Zhou\*, Jun-Liang Zhang, Meng-Han Chang, Gen-Tao Fan, Xiao-Zhou Liu, Sujia Wu, Xin Shi

### Author Affiliations:

Department of Orthopaedics, School of Medicine, Jinling Hospital, Nanjing University, Nanjing, China.

### \*Corresponding authors:

Xing Zhou, MD, Department of Orthopaedics, Jinling Hospital, School of Medicine, Nanjing University, 305 Zhongshan East Road, Nanjing, China, 210002.

Tel: 0086-013675106750; Fax: 0086-25-80860220; Email: dr\_zhouxing@126.com

**Table S1 details of the sequences used in the experiment**

| Oligonucleotide | Sequences (5'-3')                                                                  |
|-----------------|------------------------------------------------------------------------------------|
| TS primer       | AAT CCG TCG ACG AGA GTT A                                                          |
| Padlock-1       | P-TAA CTC TCG TCG TAC CTC AGCATC CCT ATC CCT<br>ATC CCT ATCCCT ACC TCA GCA AAC CC  |
| Padlock-2       | P-ACT CTC GTC GTA CCT CAG CATCCC TAT CCC TAT<br>CCC TAT CCCTAC CTC AGC AAA CCC TA  |
| Padlock-3       | P- CTC TCG TCG TAC CTC AGC ATCCCT ATC CCT ATC<br>CCT ATC CCTACC TCA GCA AAC CCT AA |
| sgRNA           | UAAUUUCUACUAAGUGUAGAUAUCCCUAUCCCUA<br>CU                                           |
| Reporter        | FAM-TTTTAAAATTATA-BHQ                                                              |

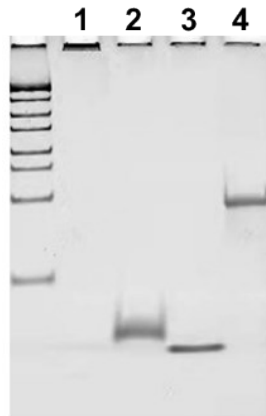

**Figure S1. Non-denaturing PAGE analysis of telomerase extension products. 1. RCA products; 2. Extended TS primer; 3. TS primer; 4. Padlock.**

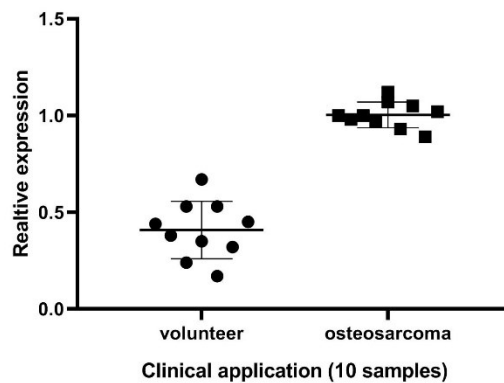

**Figure S2. Clinical application of the proposed method for the study of telomerase expression in normal volunteers and osteosarcoma patients.**
